# Supplementary material for: How and When Resilience can Boost Student Academic Performance: A Weekly Diary Study on the Roles of Self-Regulation Behaviors, Grit, and Social Support
Source: Springer Nature journal article supplement (doi:10.1007/s10902-024-00749-4), 2024-03-30
Supplement: MOESM1 [file 26926512]

**Table A** Testing the longer carry-over effects of resilience on academic performance.

|  | **Estimate** | **S.E.** | **t** | **p** | **C.I.** |
| --- | --- | --- | --- | --- | --- |
| Resilience t --> Academic performance t+2 | 0.4859 | 0.1361 | 3.5709 | 0.001** | [0.2142, 0.7576] |
| Resilience t --> Self-regulation behaviors t+1 | 0.4009 | 0.0689 | 5.8180 | < .001*** | [0.2634, 0.5385] |
| Self-regulation behaviors t+1 -- > Academic performance t+2 | 0.3086 | 0.1966 | 1.5694 | 0.1213 | [-0.084, 0.7012] |
| Resilience t -- > Self-regulation behaviors t+1-- > Academic performance t+2 | 0.1237 | 0.1000 |  |  | [-0.0078, 0.3815] |

Note: N = 74 participants and N = 296 data points, * p < .05, ** p < .01, *** p < .001

**Table B** Multilevel confirmatory factor analyses of the hypothesized model

|  | Chi-square | df | CFI | TLI | RMSEA | SRMR_between | SRMR_within | Chi-square differences (df) |
| --- | --- | --- | --- | --- | --- | --- | --- | --- |
| Five factor model | 652.201 | 408 | 0.91 | 0.9 | 0.06 | 0.05 | 0.06 |  |
| Four factor model (a) | 778.019 | 444 | 0.88 | 0.87 | 0.06 | 0.07 | 0.08 | 125.818 (36) *** |
| Four factor model (b) | 771.534 | 412 | 0.87 | 0.85 | 0.07 | 0.07 | 0.06 | 119.333 (4) *** |
| Three factor model | 776.238 | 415 | 0.87 | 0.85 | 0.07 | 0.07 | 0.06 | 124.037 (7) *** |

Note: Five factor model = weekly resilience + weekly self-regulation behaviors + weekly academic performance + grit + social support; Four factor model (a) refers to collapsing weekly resilience and weekly self-regulation behaviors into one factor; Four factor model (b) refers to collapsing social support and grit into one factor; Three factor model refers to collapsing weekly resilience, grit, and social support into one factor. *** refers to p < .001

**Table C** Longitudinal measurement invariance tests

|  |  | Chi-square | df | CFI | TLI | RMSEA | SRMR | Chi-square differences (df) | Invariance |
| --- | --- | --- | --- | --- | --- | --- | --- | --- | --- |
| Resilience | Configural invariance | 82.064 | 57 | 0.93 | 0.87 | 0.09 | 0.07 |  |  |
|  | Metric invariance | 97.976 | 73 | 0.93 | 0.9 | 0.08 | 0.11 | 15.911 (16) | Yes |
|  | Scalar invariance | 108.093 | 89 | 0.95 | 0.94 | 0.07 | 0.12 | 26.029 (32) | Yes |
| Self-regulation Behaviors | Configural invariance | 13.991 | 8 | 0.97 | 0.9 | 0.1 | 0.06 |  |  |
|  | Metric invariance | 33.401 | 17 | 0.91 | 0.87 | 0.14 | 0.17 | 19.410 (9) * | No |
|  | Scalar invariance | 41.426 | 26 | 0.91 | 0.92 | 0.11 | 0.19 | 27.435 (18) | Yes |
| Academic Performance | Configural invariance | 9.132 | 6 | 0.99 | 0.96 | 0.1 | 0.04 |  |  |
|  | Metric invariance | 12.487 | 10 | 0.99 | 0.98 | 0.07 | 0.09 | 3.355 (4) | Yes |
|  | Scalar invariance | 15.92 | 14 | 0.99 | 0.99 | 0.05 | 0.1 | 6.788 (8) | Yes |

**Table D** Alternative model with a different sequence table

|  | **Effect** | **SE** | **Z** | **P** | **C.I.** |
| --- | --- | --- | --- | --- | --- |
| **Within Effect:** |  |  |  |  |  |
| Performance t --> Self-regulation t | 0.2724 | 0.0590 | 4.6198 | < .001*** | [0.1550, 0.3897] |
| Performance t --> Resilience t+1 | -0.0218 | 0.0845 | -0.2585 | 0.7969 | [-0.1907, 0.1470] |
| Self-regulation t--> Resilience t+1 | -0.1181 | 0.1496 | -0.7892 | 0.4324 | [-0.4160, 0.1798] |
| Performance t --> Self-regulation t --> Resilience t+1 | -0.0322 | 0.0423 | -0.7608 | 0.4468 | [-0.1224, 0.0509] |
|  |  |  |  |  |  |
| Performance t --> Self-regulation t+1 | -0.0349 | 0.0599 | -0.5822 | 0.5625 | [-0.1546, 0.0848] |
| Performance t --> Resilience t+1 | -0.0242 | 0.0663 | -0.3649 | 0.7164 | [-0.1565, 0.1081] |
| Self-regulation t+1 --> Resilience t+1 | 0.6313 | 0.1323 | 4.7721 | < .001*** | [0.3678, 0.8948] |
| Performance t --> Self-regulation t+1 --> Resilience t+1 | -0.0220 | 0.0389 | -0.5658 | 0.5715 | [-0.1010, 0.0522] |
|  |  |  |  |  |  |
| Performance t --> Self-regulation t+1 | -0.0822 | 0.0778 | -1.0561 | 0.2988 | [-0.2406, 0.0763] |
| Performance t --> Resilience t+2 | 0.2262 | 0.0847 | 2.6712 | 0.0121 | [0.0533, 0.3991] |
| Self-regulation t+1--> Resilience t+2 | -0.0746 | 0.1801 | -0.4140 | 0.6810 | [-0.4379, 0.2887] |
| Performance t --> Self-regulation t+1 --> Resilience t+2 | 0.0061 | 0.0212 | 0.2891 | 0.7725 | [-0.0325, 0.0569] |

Note: N = 74 participants and N = 296 data points, * p < .05, ** p < .01, *** p < .001

**Table E** Cross-lagged panel model results


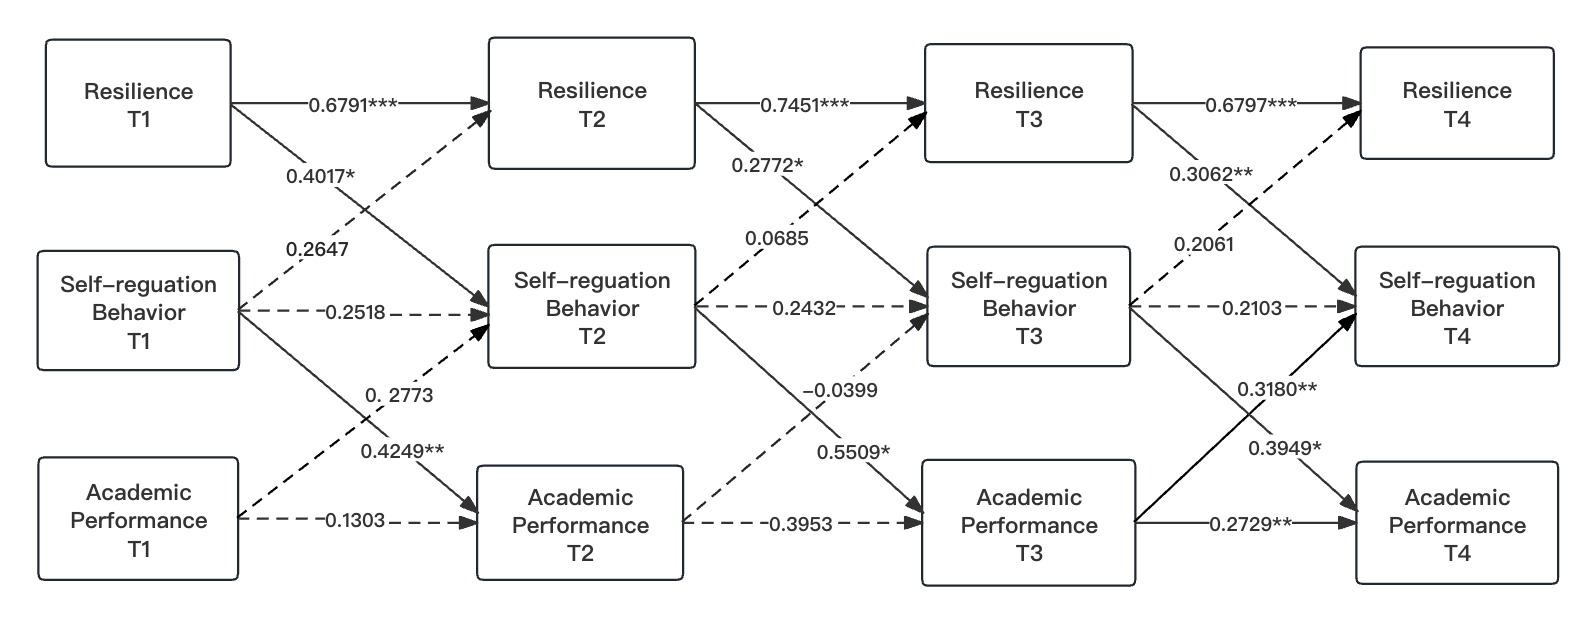


Note: *p < .05; ** p < .01; ***p<.001, N = 74 participants and N = 296 data points
